# Supplementary material for: Selective catalytic hydrogenation of 5-hydroxymethylfurfural over silica supported FeCoNiCuRu high-entropy alloy nanoparticles
Source: Royal Society of Chemistry journal article supplement (doi:10.1039/d4nj01272k), 2024-01-01
Supplement: d4nj01272k1.pdf [file d4nj01272k1.pdf]

## Support information

### Selective Catalytic Hydrogenation of 5-Hydroxymethylfurfural over Silica Supported FeCoNiCuRu High-Entropy Alloy Nanoparticles

Guojun Lan\*, Liping Zhang, Huiming Xie, Tuo Shi, Wen Luo, Yuxiang Wang, Zaizhe Cheng, Xiucheng Sun, Yiyang Qiu and Ying Li\*

Institute of Industrial Catalysis, State Key Laboratory Breeding Base of Green Chemistry Synthesis Technology, Zhejiang University of Technology, Chaowang Road 18, Hangzhou, China

\*Guojun Lan – Institute of Industrial Catalysis, State Key Laboratory Breeding Base of Green Chemistry Synthesis Technology, Zhejiang University of Technology, Hangzhou 310014, PR China; Email: languojun@zjut.edu.cn

\*Ying Li – Institute of Industrial Catalysis, State Key Laboratory Breeding Base of Green Chemistry Synthesis Technology, Zhejiang University of Technology, Hangzhou 310014, PR China; Email: liying@zjut.edu.cn

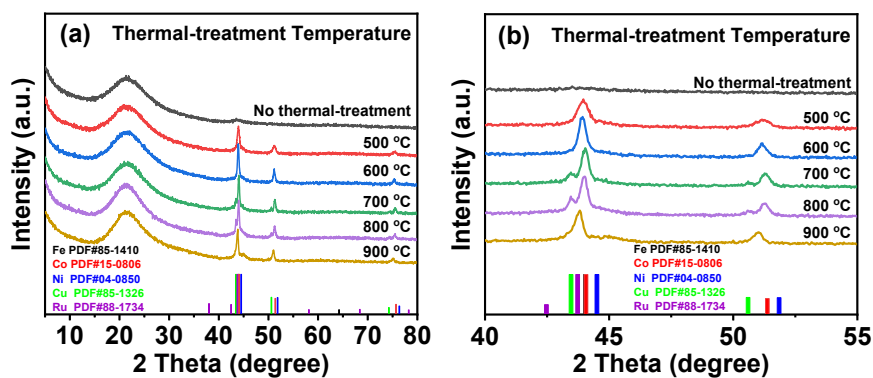

Figure S1. XRD patterns of (FeCoNiCuRu-1TA/SiO<sub>2</sub>)-T catalysts (a), enlargement of the diffraction intensity from 40° to 55° (b).

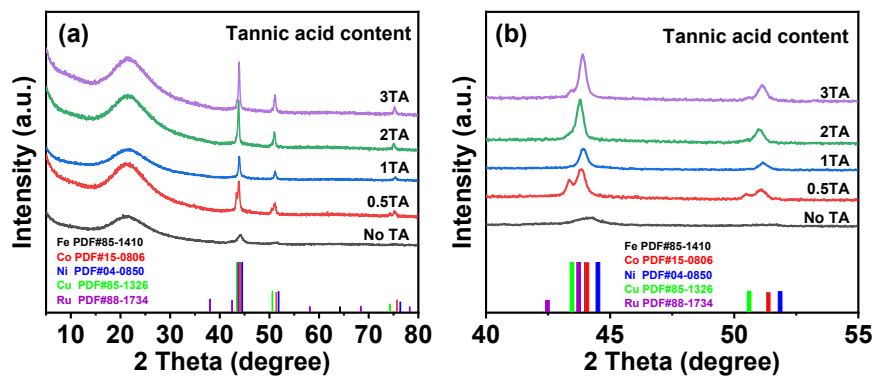

**Figure S2.** XRD patterns of (FeCoNiCuRu-xTA)/SiO<sub>2</sub>-600 catalysts (a), enlargement of the diffraction intensity from 40° to 55° (b).

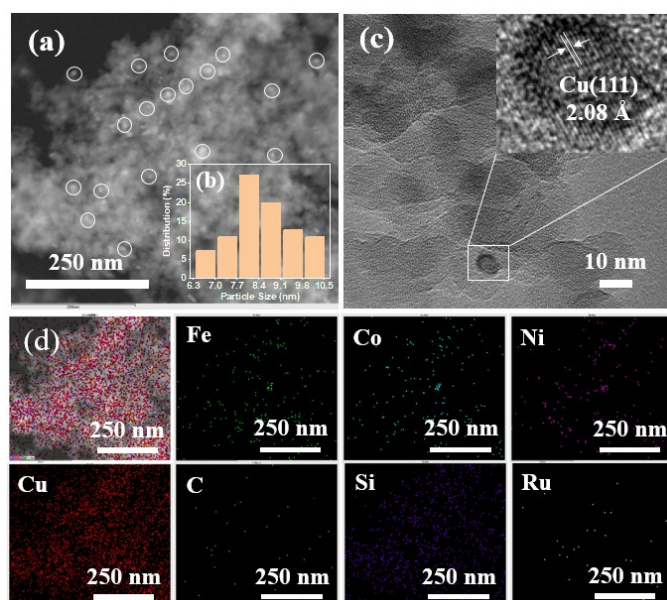

**Figure S3.** TEM image (a), particle size distribution (b), HAADF-STEM image (c) and EDS mapping of the various elements (d) of (FeCoNiCuRu)/SiO<sub>2</sub>-600 catalyst.

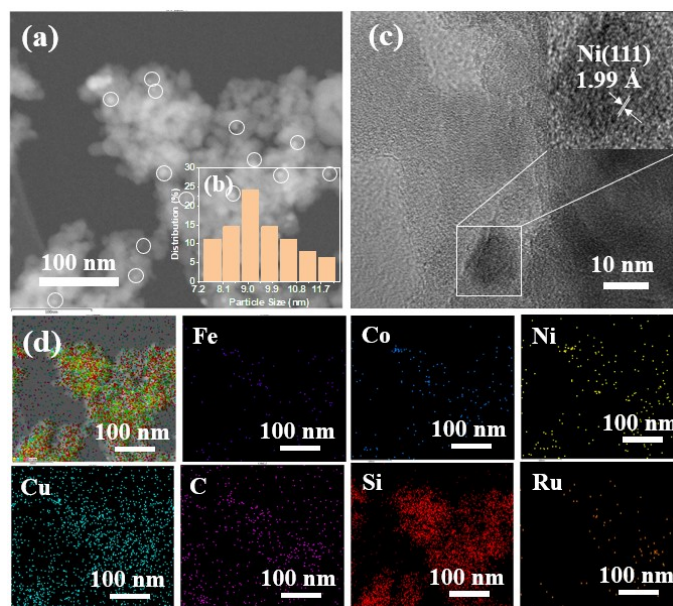

**Figure S4.** TEM image (a), particle size distribution (b), HAADF-STEM image (c) and EDS mapping of the various elements (d) of FeCoNiCuRu-1TA/SiO<sub>2</sub> catalyst.

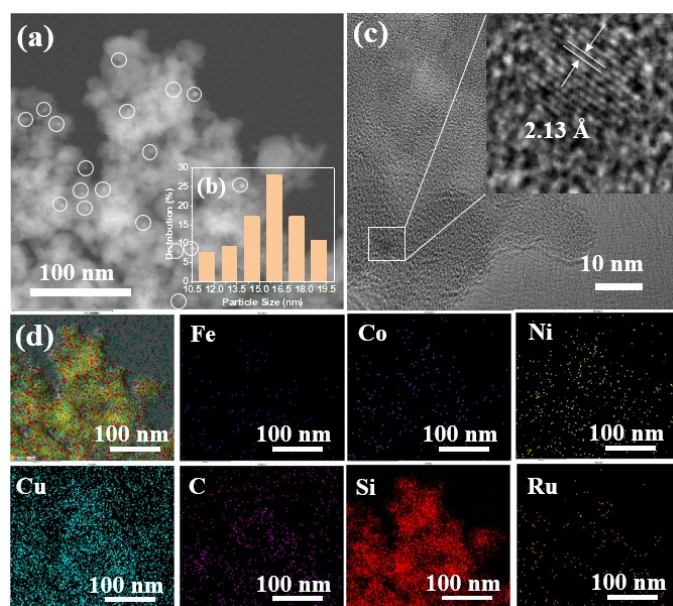

**Figure S5.** TEM image (a), particle size distribution (b), HAADF-STEM image (c) and EDS mapping of the various elements (d) of (FeCoNiCuRu-2TA/SiO<sub>2</sub>)-600 catalyst.

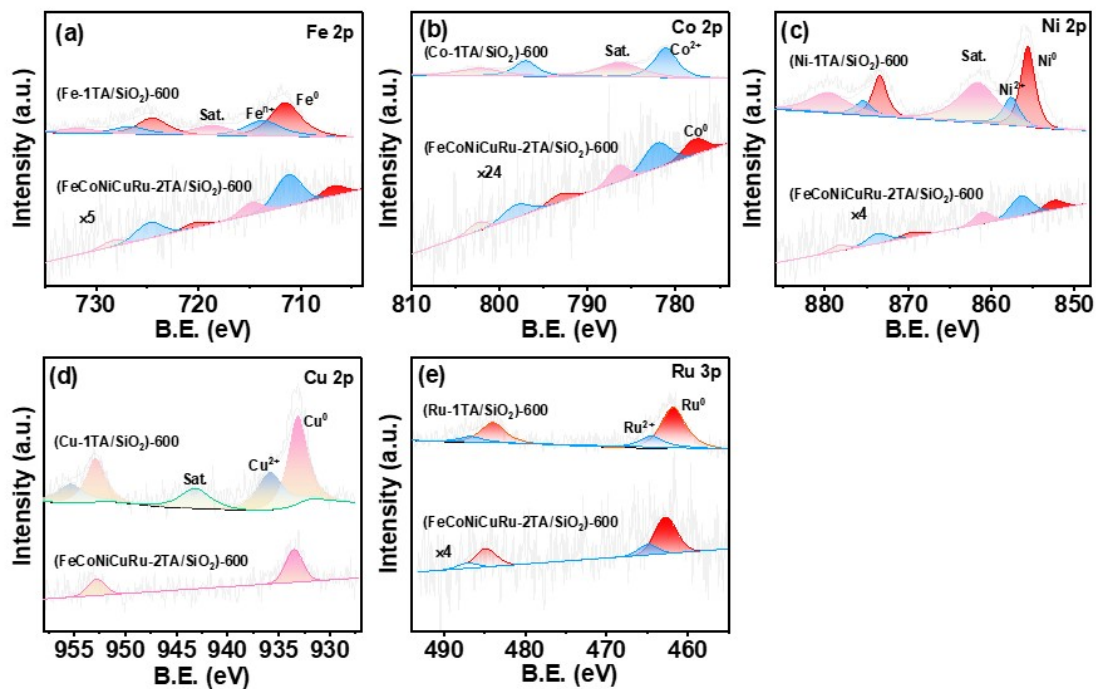

**Figure S6.** Fe 2p(a), Co 2p (b), Ni 2p (c), Cu 2p (d) and Ru 3p (e) spectra of (FeCoNiCuRu-2TA/SiO<sub>2</sub>)-600, (Fe-1TA/SiO<sub>2</sub>)-600, (Co-1TA/SiO<sub>2</sub>)-600, (Ni-1TA/SiO<sub>2</sub>)-600, (Cu-1TA/SiO<sub>2</sub>)-600 and (Ru-1TA/SiO<sub>2</sub>)-600 catalysts.

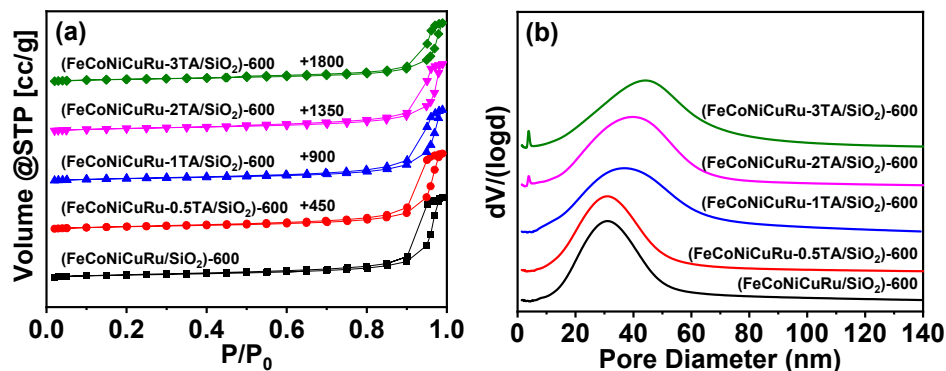

**Figure S7.** Nitrogen adsorption isotherms (a) and pore sizes (b) of (FeCoNiCuRu-xTA/SiO<sub>2</sub>)-600 catalysts.

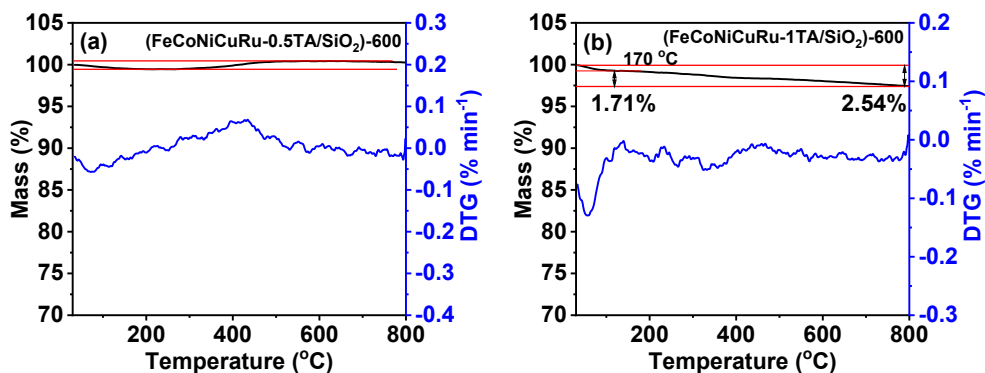

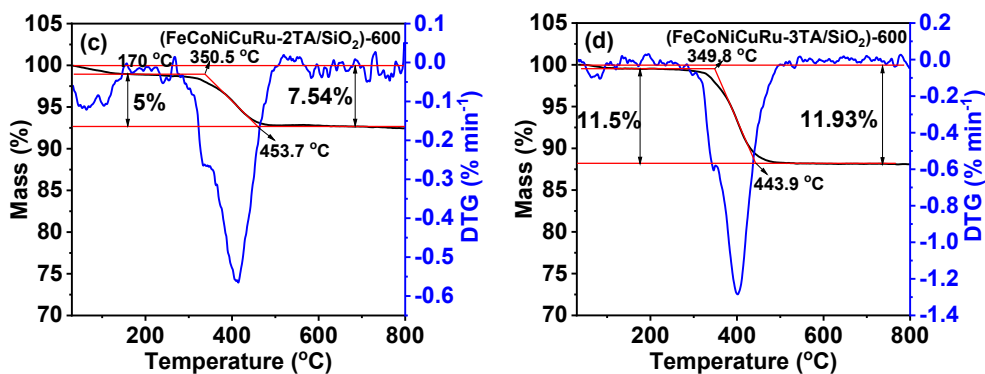

**Figure S8.** TG and DTG curves of (FeCoNiCuRu-0.5TA/SiO<sub>2</sub>)-600 (a), (FeCoNiCuRu-1TA/SiO<sub>2</sub>)-600 (b), (FeCoNiCuRu-2TA/SiO<sub>2</sub>)-600 (c) and (FeCoNiCuRu-3TA/SiO<sub>2</sub>)-600 (d) catalysts in air.

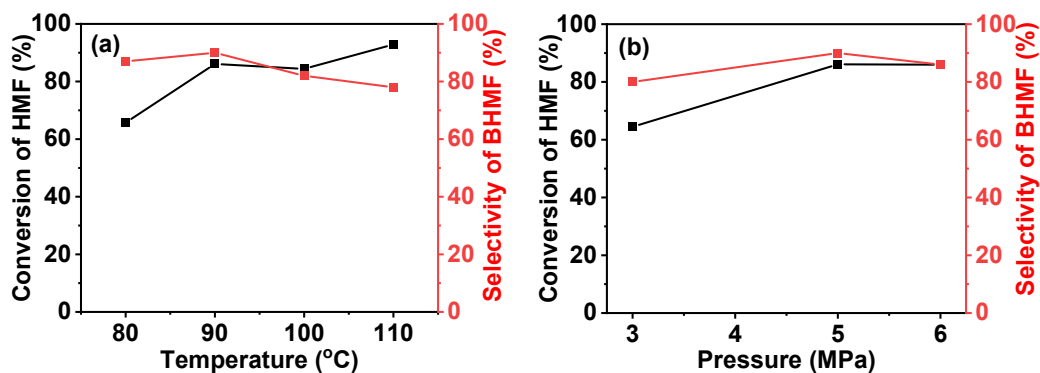

**Figure S9.** Hydrogenation of 5-hydroxymethylfurfural on the (FeCoNiCuRu-2TA/SiO<sub>2</sub>)-600 in different reaction temperature (a) and different H<sub>2</sub> pressure (b). Reaction conditions: CH<sub>3</sub>OH 25 mL, 0.25 g HMF, reaction time 2 h,  $m_{\text{substrate}}/m_{\text{catalyst}} = 50$ , 800 rpm.

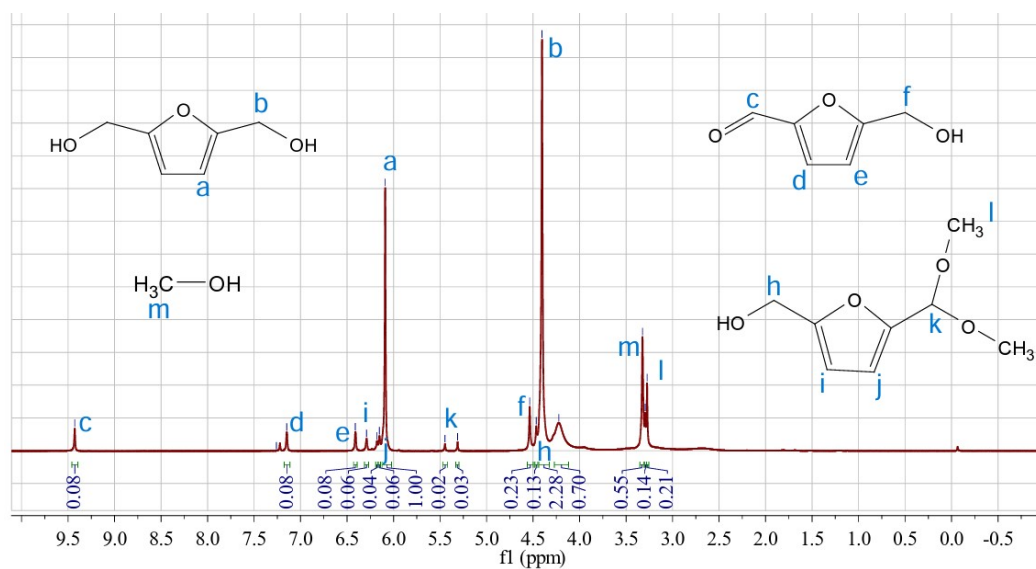

**Figure S10.** The NMR spectra of the HMF hydrogenation product mixture in the presence of the (FeCoNiCuRu-2TA/SiO<sub>2</sub>)-600 catalyst (600 M, CDCl<sub>3</sub>).

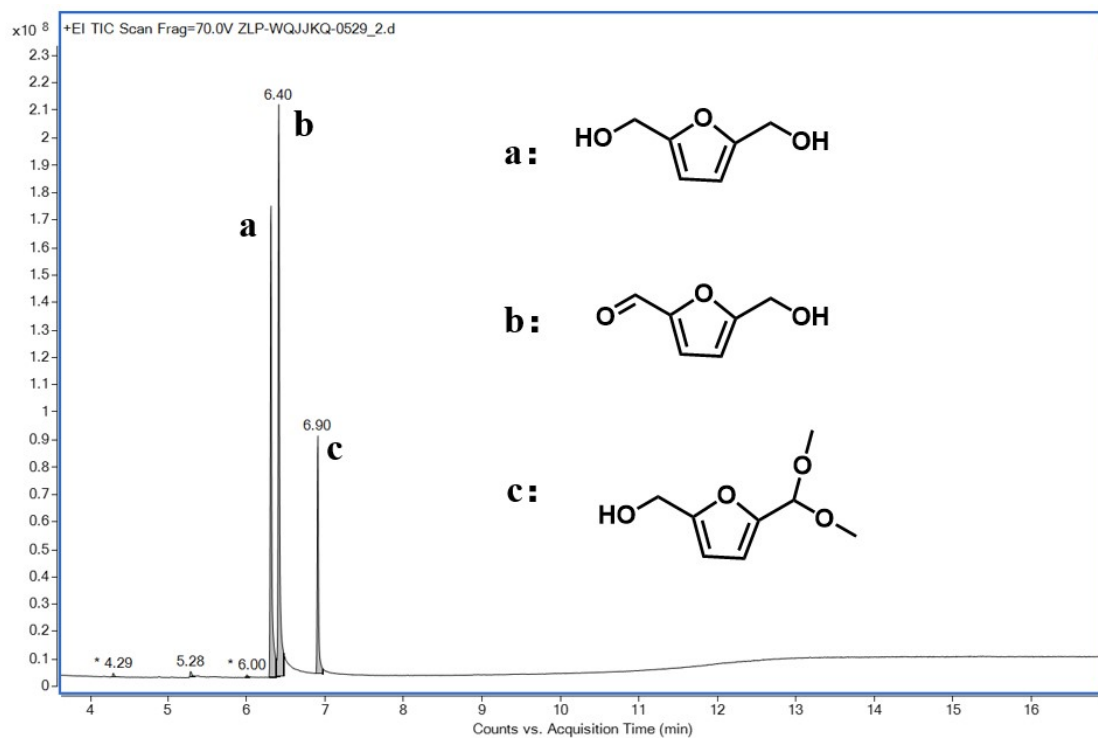

**Figure S11.** The TIC of the HMF hydrogenation product mixture in the presence of the (FeCoNiCuRu-3TA/SiO<sub>2</sub>)-600 catalyst.

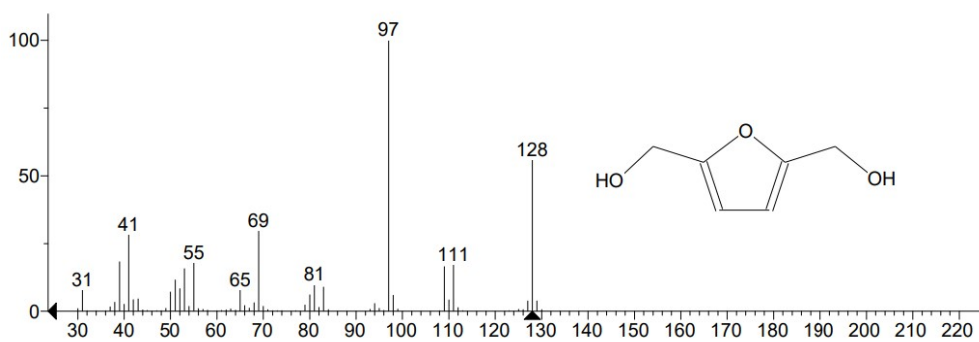

**Figure S12.** The mass spectrum of substance at 6.30 min in TIC .

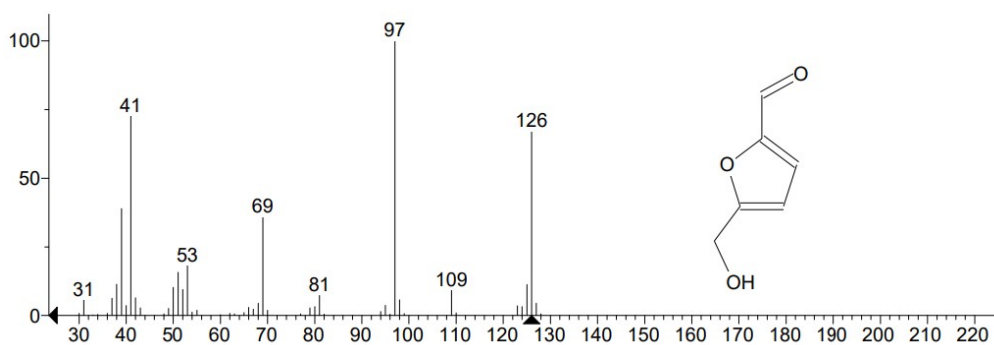

**Figure S13.** The mass spectrum of substance at 6.40 min in TIC.

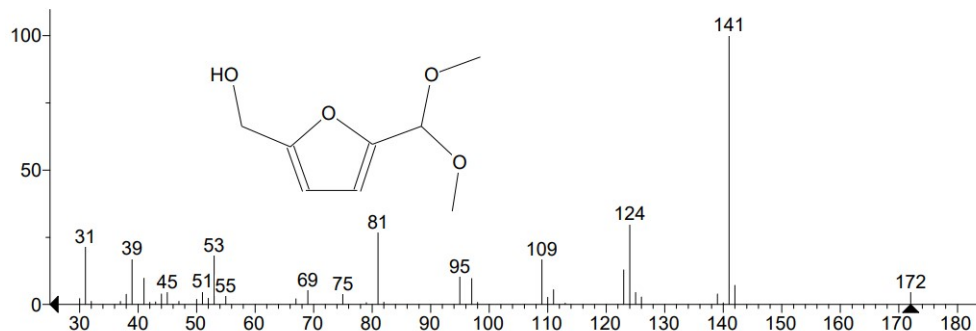

**Figure S14.** The mass spectrum of substance at 6.90 min in TIC.

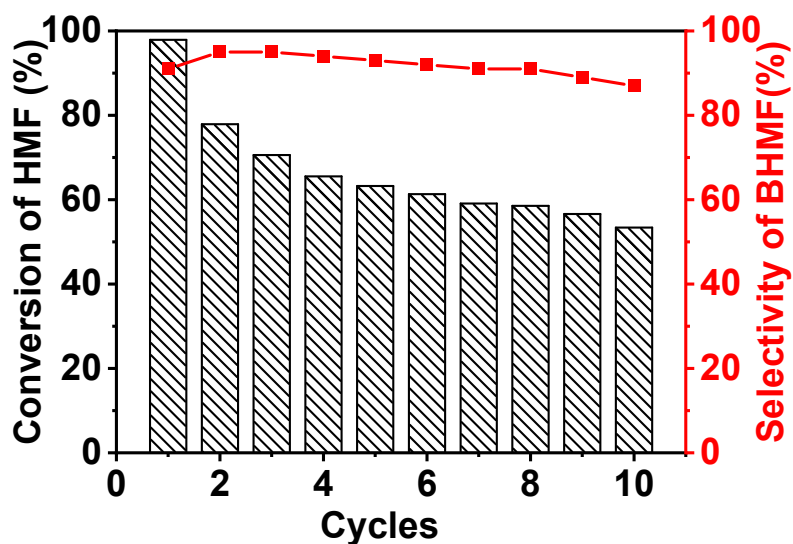

**Figure S15.** The cyclic stability of (FeCoNiCuRu-2TA/SiO<sub>2</sub>)-600 in the hydrogenation of 5-hydroxymethylfurfural. Reaction conditions: 90 °C, 5 MPa H<sub>2</sub>, CH<sub>3</sub>OH 25 mL, 0.25 g HMF, reaction time 2 h,  $m_{\text{substrate}}/m_{\text{catalyst}} = 25$ , 800 rpm.

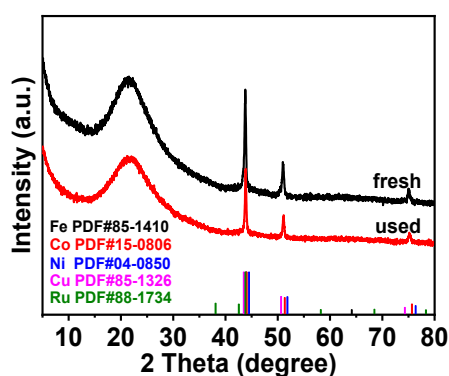

**Figure S16.** XRD patterns of fresh and used (FeCoNiCuRu-2TA/SiO<sub>2</sub>)-600 catalyst.

**Table S1.** Thermodynamic parameters of the FeCoNiCuRu HEAs.

| Parameter (unit)                  | Value |
|-----------------------------------|-------|
| $\delta$ (%)                      | 3.3   |
| $\Delta S_{\text{mix}}$ (J/mol*K) | 13.27 |
| $\Delta H_{\text{mix}}$ (kJ/mol)  | 3.61  |
| $\Omega$                          | 6.66  |
| $\text{VEC}_{\text{mix}}$         | 9.34  |

**Table S2.** Binding energy of Fe, Co, Ni, Cu and Ru in (FeCoNiCuRu-2TA/SiO<sub>2</sub>)-600, (Fe-1TA/SiO<sub>2</sub>)-600, (Co-1TA/SiO<sub>2</sub>)-600, (Ni-1TA/SiO<sub>2</sub>)-600, (Cu-1TA/SiO<sub>2</sub>)-600 and (Ru-1TA/SiO<sub>2</sub>)-600 catalysts.

| Samples                        | Binding energy /eV |                 |                 |                 |                 |
|--------------------------------|--------------------|-----------------|-----------------|-----------------|-----------------|
|                                | Fe <sup>0</sup>    | Co <sup>0</sup> | Ni <sup>0</sup> | Cu <sup>0</sup> | Ru <sup>0</sup> |
| (Fe-1TA/SiO <sub>2</sub> )-600 | 706.6              | -               | -               | -               | -               |
| (Co-1TA/SiO <sub>2</sub> )-600 | -                  | 781.5           | -               | -               | -               |
| (Ni-1TA/SiO <sub>2</sub> )-600 | -                  | -               | 855.6           | -               | -               |
| (Cu-1TA/SiO <sub>2</sub> )-600 | -                  | -               | -               | 933.0           | -               |
| (Ru-1TA/SiO <sub>2</sub> )-600 | -                  | -               | -               | -               | 461.8           |

**Table S3.** Physical properties of (FeCoNiCuRu-xTA/SiO<sub>2</sub>)-600 catalysts.

| Samples                                  | S.A.(m <sup>2</sup> /g) | P.V. (cm <sup>3</sup> /g) | P.D. (nm) <sup>a</sup> |
|------------------------------------------|-------------------------|---------------------------|------------------------|
| (FeCoNiCuRu/SiO <sub>2</sub> )-600       | 139                     | 1.12                      | 31.0                   |
| (FeCoNiCuRu-0.5TA/SiO <sub>2</sub> )-600 | 135                     | 1.08                      | 31.0                   |
| (FeCoNiCuRu-1TA/SiO <sub>2</sub> )-600   | 125                     | 0.95                      | 45.8                   |
| (FeCoNiCuRu-2TA/SiO <sub>2</sub> )-600   | 167                     | 0.94                      | 46.0                   |
| (FeCoNiCuRu-3TA/SiO <sub>2</sub> )-600   | 186                     | 0.79                      | 46.2                   |

Note: a pore diameter calculated by the desorption branches of the isotherms using the BJH method.

**Table S4.** Elemental analysis of fresh and used (FeCoNiCuRu-2TA/SiO<sub>2</sub>)-600 catalyst.

| Sample                                       | Fe (wt%) | Co (wt%) | Ni (wt%) | Cu (wt%) | Ru (wt%) |
|----------------------------------------------|----------|----------|----------|----------|----------|
| (FeCoNiCuRu-2TA/SiO <sub>2</sub> )-600-fresh | 0.98     | 0.95     | 1.00     | 1.07     | 0.90     |



| Sample                                      | Fe<br>(wt%) | Co<br>(wt%) | Ni<br>(wt%) | Cu<br>(wt%) | Ru<br>(wt%) |
|---------------------------------------------|-------------|-------------|-------------|-------------|-------------|
| (FeCoNiCuRu-2TA/SiO <sub>2</sub> )-600-used | 0.83        | 0.73        | 0.80        | 0.62        | 0.80        |
